# Supplementary material for: Environmental Influences on Sleep in the California Teachers Study Cohort
Source: PubMed Central journal article supplement — Am J Epidemiol. 2021 Oct 6;191(9):1532–9. doi: 10.1093/aje/kwab246 (PMC9437820; doi:10.1093/aje/kwab246), 2021-10-06
Supplement: web_material_kwab246.pdf [file web_material_kwab246.pdf]

## Web Material

# Environmental influences on sleep in the California Teachers Study Cohort

Authors: Charlie Zhong, Travis Longcore, Jennifer Benbow, Nadia T Chung,  
Khang Chau, Sophia S Wang, James V Lacey Jr, Meredith Franklin

### Table of Contents

Web Figure 1. Distribution across California, United States for A) Noise B) Particulate Matter 2.5 microns  
C) New World Atlas of Artificial Night Sky Brightness D) Enhanced Vegetation Index

Web Table 1. Correlation between environmental exposures

Web Table 2. Correlation between self-reported sleep measures

Web Table 3. Multipollutant model of environmental exposures and sleep among 42,239 participants  
residing in Rural-Urban Commuting Area Codes 1-3

Web Table 4. Multipollutant model of environmental exposures and sleep with a natural sound model

Web Table 5. Multipollutant model of environmental exposures and sleep adjusting for neighborhood  
socioeconomic status

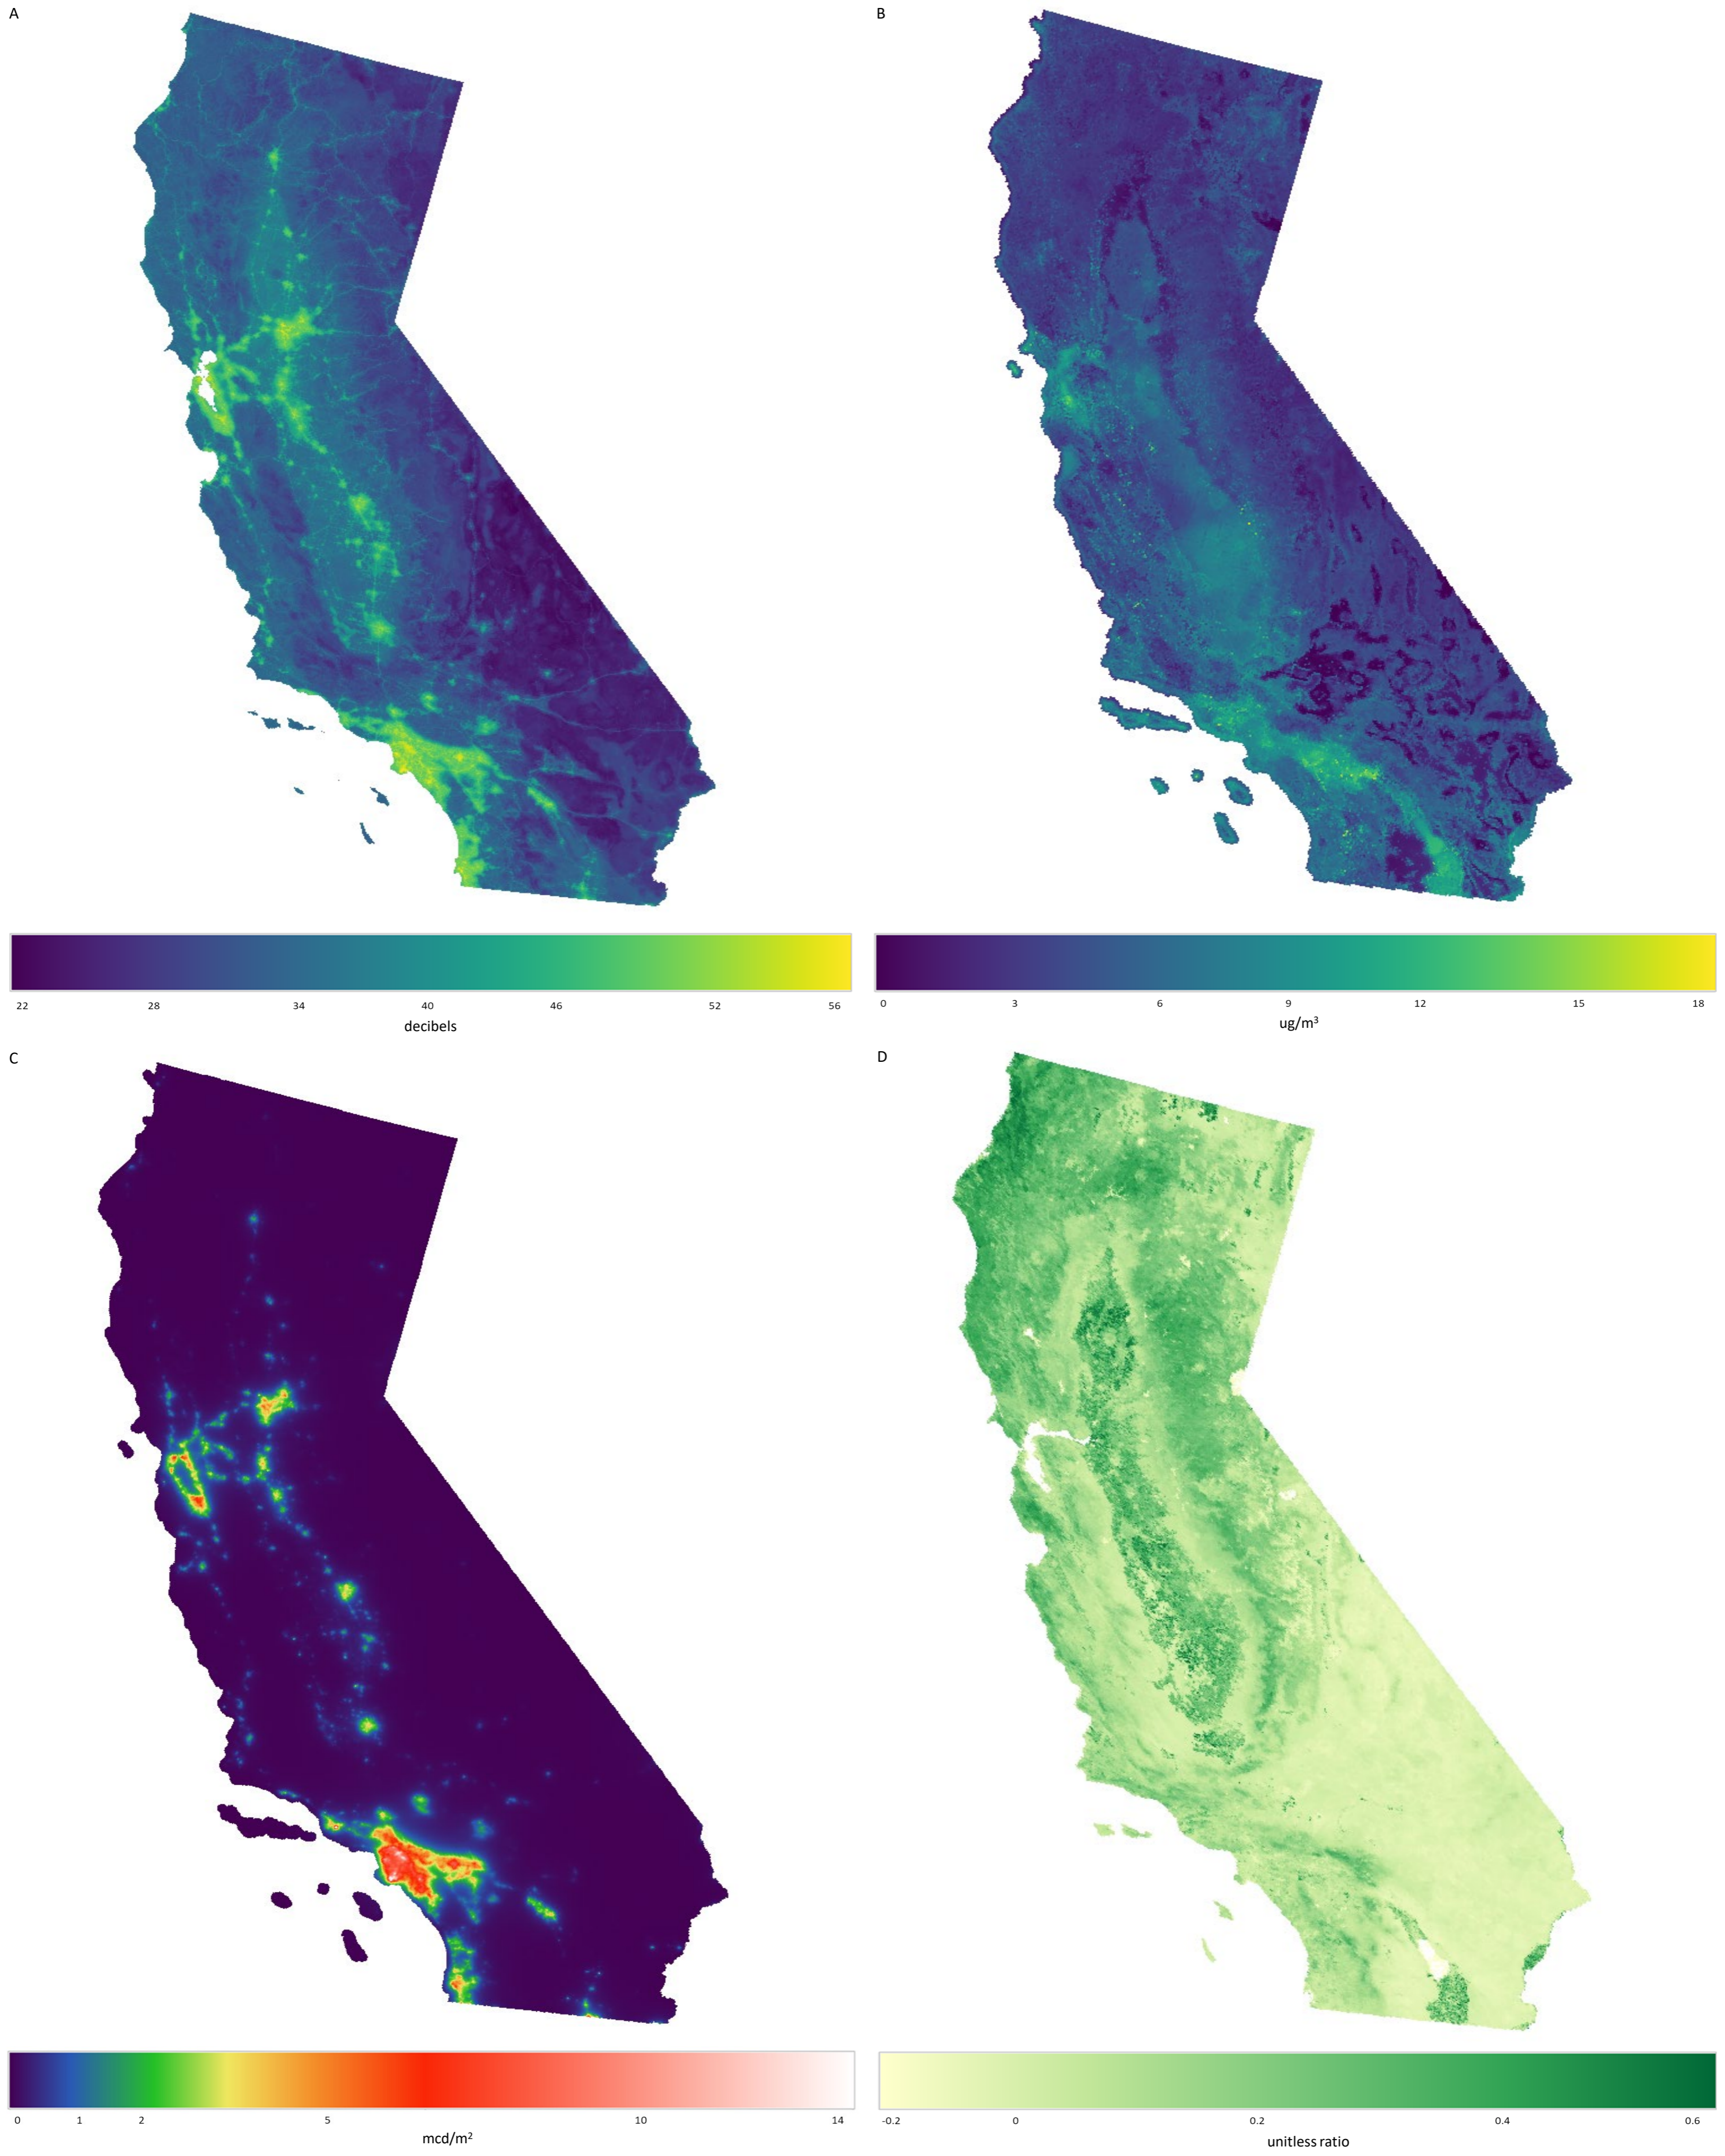

Web Figure 1. Distribution across California, United States for A) Noise B) Particulate Matter 2.5 microns C) New World Atlas of Artificial Night Sky Brightness D) Enhanced Vegetation Index

Web Table 1. Correlation between environmental exposures

|                | Light at night | Noise | Natural Noise | EVI    | PM2.5  | SES z-score |
|----------------|----------------|-------|---------------|--------|--------|-------------|
| Light at night | 1              | 0.002 | 0.003         | -0.46  | 0.4    | -0.005      |
| Noise          |                | 1     | 0.31          | -0.003 | -0.004 | -0.0004     |
| Natural Noise  |                |       | 1             | -0.003 | 0.003  | 0.00009     |
| EVI            |                |       |               | 1      | -0.22  | 0.16        |
| PM2.5          |                |       |               |        | 1      | -0.09       |
| SES z-score    |                |       |               |        |        | 1           |

Web Table 2. Correlation between self-reported sleep measures

|                | Latency | Duration | Disturbance | Medication use |
|----------------|---------|----------|-------------|----------------|
| Latency        | 1       | 0.279    | 0.464       | 0.28           |
| Duration       |         | 1        | 0.407       | 0.103          |
| Disturbance    |         |          | 1           | 0.268          |
| Medication use |         |          |             | 1              |

Web Table 3. Multipollutant model of environmental exposures and sleep among 42,239 participants residing in Rural-Urban Commuting Area Codes 1-3

|                           | Sleep duration (< 7 hours) |                         | Sleep latency (> 15 min) |                         |
|---------------------------|----------------------------|-------------------------|--------------------------|-------------------------|
|                           | Odds Ratio*                | 95% Confidence Interval | Odds Ratio**             | 95% Confidence Interval |
| Light at night (5 mcd/m2) | <b>1.13</b>                | <b>(1.05-1.020)</b>     | 0.97                     | (0.92-1.04)             |
| Noise (10 dB)             | 1.02                       | (0.95-1.10)             | <b>1.07</b>              | <b>(1.00-1.14)</b>      |
| Greenspace (0.1 units)    | <b>0.41</b>                | <b>(0.26-0.63)</b>      | <b>0.57</b>              | <b>(0.39-0.85)</b>      |
| Air pollution (5 ug/m3)   | <b>1.07</b>                | <b>(1.03-1.10)</b>      | 1.02                     | (0.99-1.05)             |

\*adjusted for age, race, chronotype, use of sleep medication, trouble sleeping, and sleep latency

\*\*adjusted for age, race, chronotype, use of sleep medication, trouble sleeping, and sleep duration

Web Table 4. Multipollutant model of environmental exposures and sleep with a natural sound model

|                                        | Sleep duration (< 7 hours) |                         | Sleep latency (> 15 min) |                         |
|----------------------------------------|----------------------------|-------------------------|--------------------------|-------------------------|
|                                        | Odds Ratio*                | 95% Confidence Interval | Odds Ratio**             | 95% Confidence Interval |
| Light at night (5 mcd/m <sup>2</sup> ) | <b>1.12</b>                | <b>1.06-1.19</b>        | 0.97                     | 0.91-1.02               |
| Natural Noise (10 dB)                  | 1.01                       | 0.91-1.13               | 1.09                     | 0.99-1.20               |
| Greenspace (0.1 units)                 | <b>0.40</b>                | <b>0.27-0.65</b>        | <b>0.59</b>              | <b>0.41-0.84</b>        |
| Air pollution (5 ug/m <sup>3</sup> )   | <b>1.06</b>                | <b>1.04-1.09</b>        | 1.02                     | 0.99-1.05               |

\*adjusted for age, race, chronotype, use of sleep medication, trouble sleeping, and sleep latency

\*\*adjusted for age, race, chronotype, use of sleep medication, trouble sleeping, and sleep duration

Web Table 5. Multipollutant model of environmental exposures and sleep adjusting for neighborhood socioeconomic status

|                           | Sleep duration (< 7 hours) |                         | Sleep latency (> 15 min) |                         |
|---------------------------|----------------------------|-------------------------|--------------------------|-------------------------|
|                           | Odds Ratio*                | 95% Confidence Interval | Odds Ratio**             | 95% Confidence Interval |
| Light at night (5 mcd/m3) | <b>1.14</b>                | <b>1.08-1.21</b>        | 0.99                     | 0.93-1.04               |
| Noise (10 dB)             | 1.01                       | 0.91-1.13               | 1.09                     | 0.99-1.20               |
| Greenspace (0.1 units)    | <b>0.49</b>                | <b>0.33-0.73</b>        | 0.76                     | 0.53-1.09               |
| Air pollution (5 ug/m3)   | <b>1.06</b>                | <b>1.03-1.09</b>        | 1.02                     | 0.99-1.04               |

\*adjusted for age, race, chronotype, use of sleep medication, trouble sleeping, and sleep latency

\*\*adjusted for age, race, chronotype, use of sleep medication, trouble sleeping, and sleep duration
